# Supplementary material for: Understanding HLA associations from SNP summary association statistics
Source: PubMed Central journal article supplement (PMC6362191; doi:10.1038/s41598-018-37840-9), 2019-02-04
Supplement: 41598_2018_37840_MOESM1_ESM.pdf [file 41598_2018_37840_MOESM1_ESM.pdf]

## *Supplementary Information*

### **Understanding HLA associations from SNP summary association statistics**

Jiwoo Lim<sup>1</sup>, Sang-Cheol Bae<sup>2</sup>, and Kwangwoo Kim<sup>\*,1</sup>

<sup>1</sup>Department of Biology, Kyung Hee University, Seoul, Republic of Korea.

<sup>2</sup>Department of Rheumatology, Hanyang University Hospital for Rheumatic Diseases, Seoul, Republic of Korea.

Correspondence and requests for materials should be addressed to KK (email: [kkim@khu.ac.kr](mailto:kkim@khu.ac.kr))

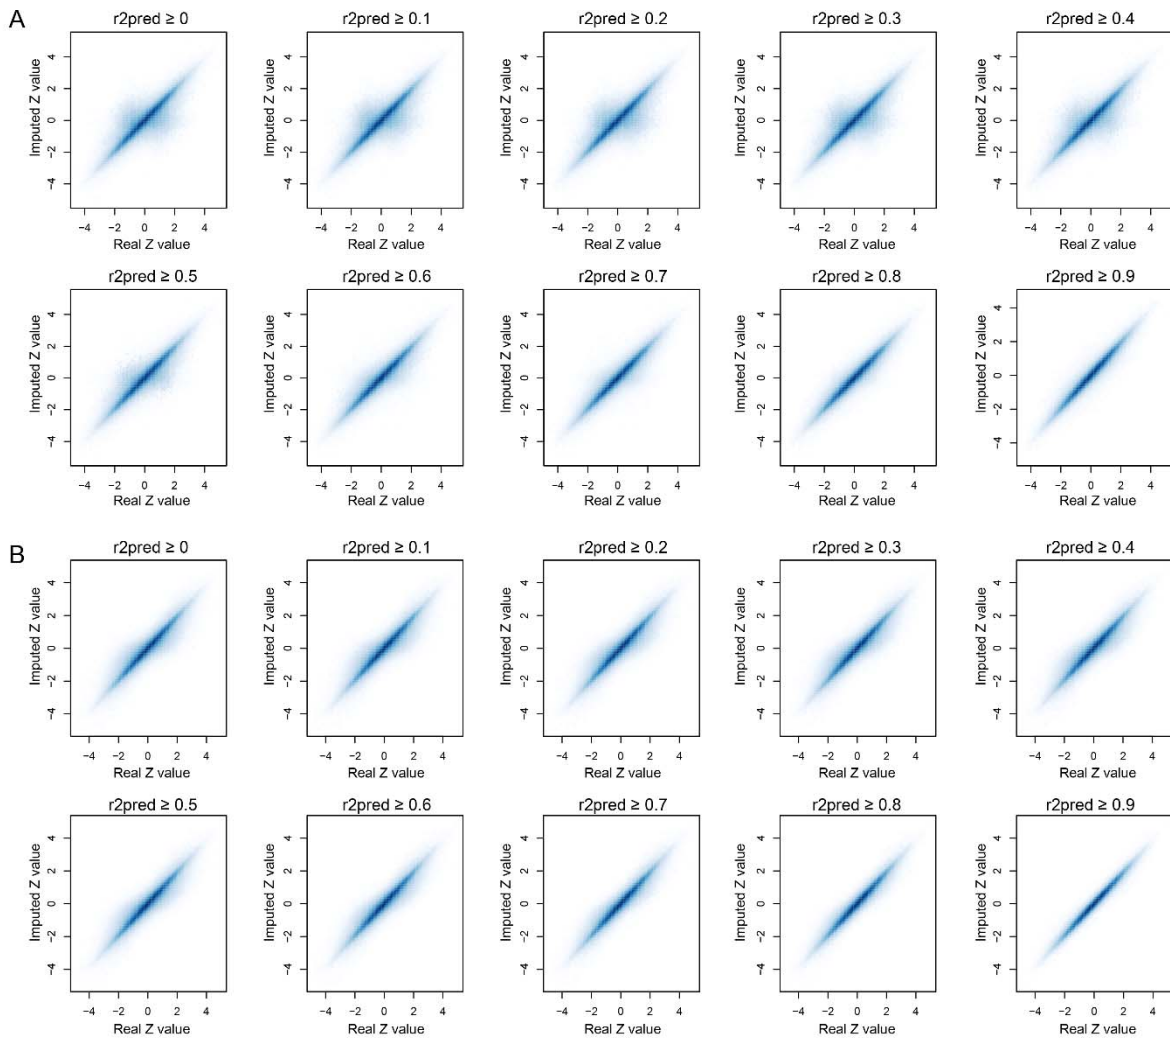

**Supplementary Figure 1** | For GWAS data from (A) Asians and (B) Europeans with random disease phenotypes, DISH-imputed Z scores (y-axis) were plotted with Z scores from SNP2HLA-imputed genotypes at various  $r^2_{pred}$  thresholds (from 0 to 0.9).

**Supplementary Table 1** | Ratio of the observed number of significant associations in DISH results to SNP2HLA results at various lambda values, association  $P$  threshold levels, and  $r^2_{pred}$  values in the Asian null-model dataset.

|                                           | Association $P$ threshold |       |       |        |         |
|-------------------------------------------|---------------------------|-------|-------|--------|---------|
|                                           | 0.5                       | 0.05  | 0.005 | 0.0005 | 0.00005 |
| <i>r<sup>2</sup><sub>pred</sub> ≥ 0</i>   |                           |       |       |        |         |
| $\lambda=0.05$                            | 0.888                     | 0.837 | 0.881 | 0.993  | 1.209   |
| $\lambda=0.10$                            | 0.865                     | 0.784 | 0.802 | 0.861  | 1.093   |
| $\lambda=0.15$                            | 0.850                     | 0.751 | 0.747 | 0.786  | 0.959   |
| $\lambda=0.20$                            | 0.839                     | 0.724 | 0.699 | 0.722  | 0.866   |
| $\lambda=0.25$                            | 0.829                     | 0.701 | 0.659 | 0.676  | 0.808   |
| $\lambda=0.30$                            | 0.821                     | 0.682 | 0.623 | 0.640  | 0.756   |
| <i>r<sup>2</sup><sub>pred</sub> ≥ 0.5</i> |                           |       |       |        |         |
| $\lambda=0.05$                            | 0.893                     | 0.840 | 0.883 | 0.993  | 1.209   |
| $\lambda=0.10$                            | 0.896                     | 0.806 | 0.808 | 0.861  | 1.093   |
| $\lambda=0.15$                            | 0.886                     | 0.773 | 0.752 | 0.786  | 0.959   |
| $\lambda=0.20$                            | 0.878                     | 0.747 | 0.705 | 0.723  | 0.866   |
| $\lambda=0.25$                            | 0.871                     | 0.725 | 0.665 | 0.677  | 0.808   |
| $\lambda=0.30$                            | 0.896                     | 0.708 | 0.629 | 0.641  | 0.756   |
| <i>r<sup>2</sup><sub>pred</sub> ≥ 0.6</i> |                           |       |       |        |         |
| $\lambda=0.05$                            | 0.912                     | 0.856 | 0.887 | 0.994  | 1.209   |
| $\lambda=0.10$                            | 0.898                     | 0.809 | 0.810 | 0.863  | 1.093   |
| $\lambda=0.15$                            | 0.918                     | 0.779 | 0.755 | 0.788  | 0.959   |
| $\lambda=0.20$                            | 0.912                     | 0.754 | 0.708 | 0.723  | 0.866   |
| $\lambda=0.25$                            | 0.908                     | 0.732 | 0.669 | 0.678  | 0.808   |
| $\lambda=0.30$                            | 0.904                     | 0.714 | 0.633 | 0.642  | 0.756   |
| <i>r<sup>2</sup><sub>pred</sub> ≥ 0.7</i> |                           |       |       |        |         |
| $\lambda=0.05$                            | 0.938                     | 0.861 | 0.889 | 0.994  | 1.209   |
| $\lambda=0.10$                            | 0.929                     | 0.816 | 0.814 | 0.864  | 1.093   |
| $\lambda=0.15$                            | 0.938                     | 0.820 | 0.778 | 0.793  | 0.965   |
| $\lambda=0.20$                            | 0.932                     | 0.794 | 0.731 | 0.729  | 0.871   |
| $\lambda=0.25$                            | 0.931                     | 0.774 | 0.692 | 0.685  | 0.813   |
| $\lambda=0.30$                            | 0.930                     | 0.757 | 0.657 | 0.651  | 0.760   |
| <i>r<sup>2</sup><sub>pred</sub> ≥ 0.8</i> |                           |       |       |        |         |
| $\lambda=0.05$                            | 0.956                     | 0.903 | 0.916 | 0.997  | 1.211   |
| $\lambda=0.10$                            | 0.952                     | 0.859 | 0.841 | 0.869  | 1.094   |
| $\lambda=0.15$                            | 0.950                     | 0.831 | 0.790 | 0.801  | 0.970   |
| $\lambda=0.20$                            | 0.947                     | 0.808 | 0.746 | 0.742  | 0.887   |
| $\lambda=0.25$                            | 0.943                     | 0.786 | 0.704 | 0.693  | 0.814   |
| $\lambda=0.30$                            | 0.939                     | 0.767 | 0.665 | 0.654  | 0.771   |
| <i>r<sup>2</sup><sub>pred</sub> ≥ 0.9</i> |                           |       |       |        |         |
| $\lambda=0.05$                            | 0.970                     | 0.916 | 0.926 | 0.985  | 1.200   |
| $\lambda=0.10$                            | 0.965                     | 0.875 | 0.855 | 0.835  | 1.068   |
| $\lambda=0.15$                            | 0.959                     | 0.838 | 0.770 | 0.780  | 0.934   |
| $\lambda=0.20$                            | 0.959                     | 0.829 | 0.746 | 0.767  | 0.913   |
| $\lambda=0.25$                            | 0.957                     | 0.819 | 0.730 | 0.753  | 0.893   |
| $\lambda=0.30$                            | 0.956                     | 0.811 | 0.705 | 0.743  | 0.938   |

**Supplementary Table 2** | Ratio of the observed number of significant associations in DISH results to SNP2HLA results at various lambda values, association  $P$  threshold levels, and  $r2_{pred}$  values in the European null-model dataset.

|                     | Association $P$ threshold |       |       |        |         |
|---------------------|---------------------------|-------|-------|--------|---------|
|                     | 0.5                       | 0.05  | 0.005 | 0.0005 | 0.00005 |
| <i>r2pred</i> ≥ 0   |                           |       |       |        |         |
| $\lambda=0.05$      | 0.923                     | 0.841 | 0.918 | 1.249  | 2.113   |
| $\lambda=0.10$      | 0.904                     | 0.775 | 0.780 | 0.966  | 1.403   |
| $\lambda=0.15$      | 0.890                     | 0.727 | 0.691 | 0.781  | 1.023   |
| $\lambda=0.20$      | 0.879                     | 0.689 | 0.624 | 0.652  | 0.795   |
| $\lambda=0.25$      | 0.868                     | 0.656 | 0.571 | 0.562  | 0.666   |
| $\lambda=0.30$      | 0.859                     | 0.627 | 0.527 | 0.494  | 0.548   |
| <i>r2pred</i> ≥ 0.5 |                           |       |       |        |         |
| $\lambda=0.05$      | 0.931                     | 0.847 | 0.922 | 1.253  | 2.115   |
| $\lambda=0.10$      | 0.914                     | 0.782 | 0.785 | 0.971  | 1.405   |
| $\lambda=0.15$      | 0.903                     | 0.738 | 0.698 | 0.787  | 1.028   |
| $\lambda=0.20$      | 0.897                     | 0.705 | 0.635 | 0.663  | 0.804   |
| $\lambda=0.25$      | 0.888                     | 0.673 | 0.582 | 0.572  | 0.673   |
| $\lambda=0.30$      | 0.881                     | 0.645 | 0.537 | 0.502  | 0.550   |
| <i>r2pred</i> ≥ 0.6 |                           |       |       |        |         |
| $\lambda=0.05$      | 0.935                     | 0.853 | 0.928 | 1.260  | 2.130   |
| $\lambda=0.10$      | 0.923                     | 0.794 | 0.795 | 0.976  | 1.401   |
| $\lambda=0.15$      | 0.913                     | 0.748 | 0.696 | 0.760  | 0.951   |
| $\lambda=0.20$      | 0.905                     | 0.712 | 0.632 | 0.642  | 0.752   |
| $\lambda=0.25$      | 0.899                     | 0.684 | 0.583 | 0.561  | 0.641   |
| $\lambda=0.30$      | 0.894                     | 0.659 | 0.542 | 0.496  | 0.529   |
| <i>r2pred</i> ≥ 0.7 |                           |       |       |        |         |
| $\lambda=0.05$      | 0.944                     | 0.862 | 0.916 | 1.183  | 1.829   |
| $\lambda=0.10$      | 0.933                     | 0.805 | 0.789 | 0.933  | 1.259   |
| $\lambda=0.15$      | 0.925                     | 0.765 | 0.706 | 0.760  | 0.935   |
| $\lambda=0.20$      | 0.920                     | 0.736 | 0.647 | 0.649  | 0.764   |
| $\lambda=0.25$      | 0.919                     | 0.709 | 0.596 | 0.566  | 0.643   |
| $\lambda=0.30$      | 0.912                     | 0.681 | 0.550 | 0.489  | 0.482   |
| <i>r2pred</i> ≥ 0.8 |                           |       |       |        |         |
| $\lambda=0.05$      | 0.954                     | 0.879 | 0.921 | 1.165  | 1.761   |
| $\lambda=0.10$      | 0.950                     | 0.828 | 0.783 | 0.884  | 1.119   |
| $\lambda=0.15$      | 0.941                     | 0.784 | 0.693 | 0.690  | 0.726   |
| $\lambda=0.20$      | 0.938                     | 0.759 | 0.641 | 0.591  | 0.549   |
| $\lambda=0.25$      | 0.936                     | 0.740 | 0.606 | 0.536  | 0.490   |
| $\lambda=0.30$      | 0.932                     | 0.720 | 0.574 | 0.488  | 0.408   |
| <i>r2pred</i> ≥ 0.9 |                           |       |       |        |         |
| $\lambda=0.05$      | 0.974                     | 0.904 | 0.880 | 0.968  | 1.097   |
| $\lambda=0.10$      | 0.967                     | 0.860 | 0.779 | 0.806  | 0.800   |
| $\lambda=0.15$      | 0.960                     | 0.823 | 0.710 | 0.669  | 0.625   |
| $\lambda=0.20$      | 0.956                     | 0.802 | 0.673 | 0.614  | 0.548   |
| $\lambda=0.25$      | 0.953                     | 0.787 | 0.645 | 0.569  | 0.501   |
| $\lambda=0.30$      | 0.949                     | 0.768 | 0.615 | 0.528  | 0.447   |
